# Supplementary material for: Structural and magnetic properties of core-shell Au/Fe3O4 nanoparticles
Source: PubMed Central journal article supplement (PMC5292710; doi:10.1038/srep41732), 2017-02-06
Supplement: srep41732-s1.pdf [file srep41732-s1.pdf]

## Structural and magnetic properties of core-shell Au/Fe<sub>3</sub>O<sub>4</sub> nanoparticles

Lizbet León F.<sup>1,2</sup>, J. A. H. Coaquira<sup>1</sup>, M. A. R. Martínez<sup>1</sup>, G. F. Goya<sup>2</sup>, J. Mantilla<sup>1</sup>, M. H. Sousa<sup>3</sup>, L. de los Santos Valladares<sup>4</sup>, C.H.W. Barnes<sup>4</sup> and P. C. Morais<sup>1,5</sup>

<sup>1</sup>Laboratory of Magnetic Characterization, Instituto de Física, Universidade de Brasília, DF 70910-900, Brasília, Brazil.

<sup>2</sup>Instituto de Nanociencia de Aragón (INA), Universidad de Zaragoza, 50018 Zaragoza, Spain.

<sup>3</sup>Green Nanotechnology Group, Faculdade de Ceilândia, Universidade de Brasília, Ceilândia, DF 72220-900, Brasília, Brazil.

<sup>4</sup>Cavendish Laboratory, Department of Physics, University of Cambridge, J.J Thomson Av., Cambridge CB3 0HE, United Kingdom

<sup>5</sup>School of Chemistry and Chemical Engineering, Anhui University, Hefei 230601, China

Correspondence and requests for materials should be addressed to L. de los Santos Valladares (ld301@cam.ac.uk)

### Supplementary material

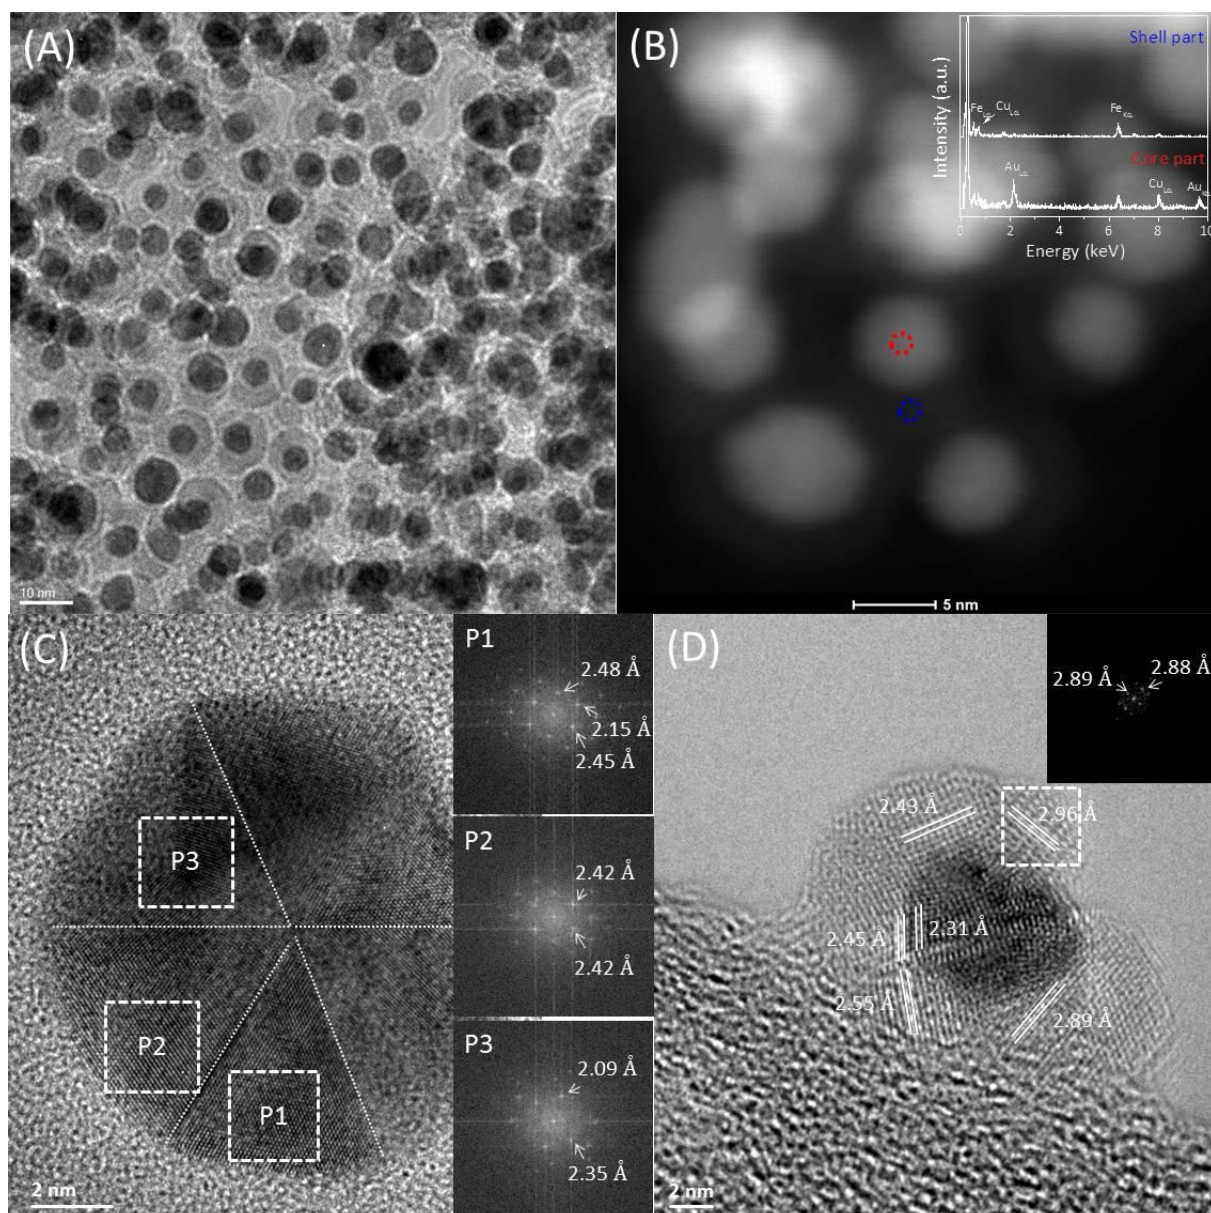

**Fig. S1**

Transmission electron microscopy (TEM) images of the core-shell Au/Fe<sub>3</sub>O<sub>4</sub> nanoparticles. a) TEM images of dispersed particles. b) Dark-field TEM image. The inset shows the EDS spectra acquired from the marked areas that confirms the presence of Au core and shell magnetite (Cu and C peaks are due to carbon copper grid). c) HR-TEM of a Au nanoparticle and electrons diffraction patterns obtained from selected areas and d) HR-TEM of an individual Au-Fe<sub>3</sub>O<sub>4</sub> core-shell NP and its respective electron diffraction patterns (inset). The faceted surface of the Au core match well to the

observed fringes of 2.89, 2.55, 2.45, 2.43 and 2.96 Å thicknesses which correspond to the (022), (113), (222), (222) and (022) reflections of the spinel structure of the magnetite (the 2.31 Å thickness fringe with (111) reflection corresponds to the gold core). The inset EDS comes from the highlighted region with fringes 2.89 and 2.88 Å and corresponds to the (111) and (022) reflection of the magnetite.

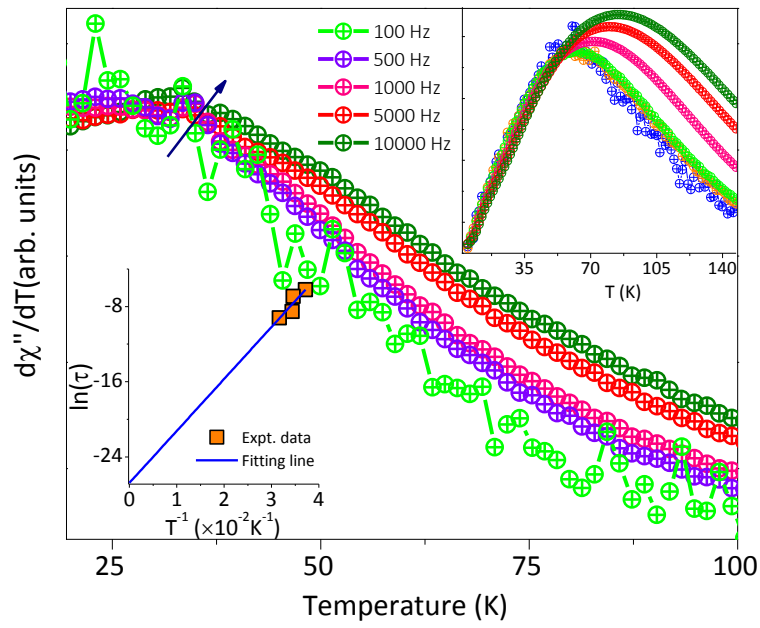

**Fig. S2**

Temperature dependence for the out-of-phase component of the ac magnetic susceptibility of the ferrofluid Au/Fe<sub>3</sub>O<sub>4</sub>. Curves were obtained for increasing excitation frequencies at fixed amplitude of 5 Oe. Main panel shows the derivative of the  $\chi''(T)$  curves from Fig. 4 that present a maximum at lower temperatures. The upper right panel shows the  $\chi''$  vs T plot. The lower-left panel shows the plots of the relaxation time as a function of the inverse of  $T_m$ . The solid line is the fit with a Néel-Arrhenius relation.
